# Supplementary material
Source: PubMed Central journal article supplement (PMC506794)
Supplement: nar_32_13_3887__1.pdf [file nar_32_13_3887__1.pdf]

Supplementary material

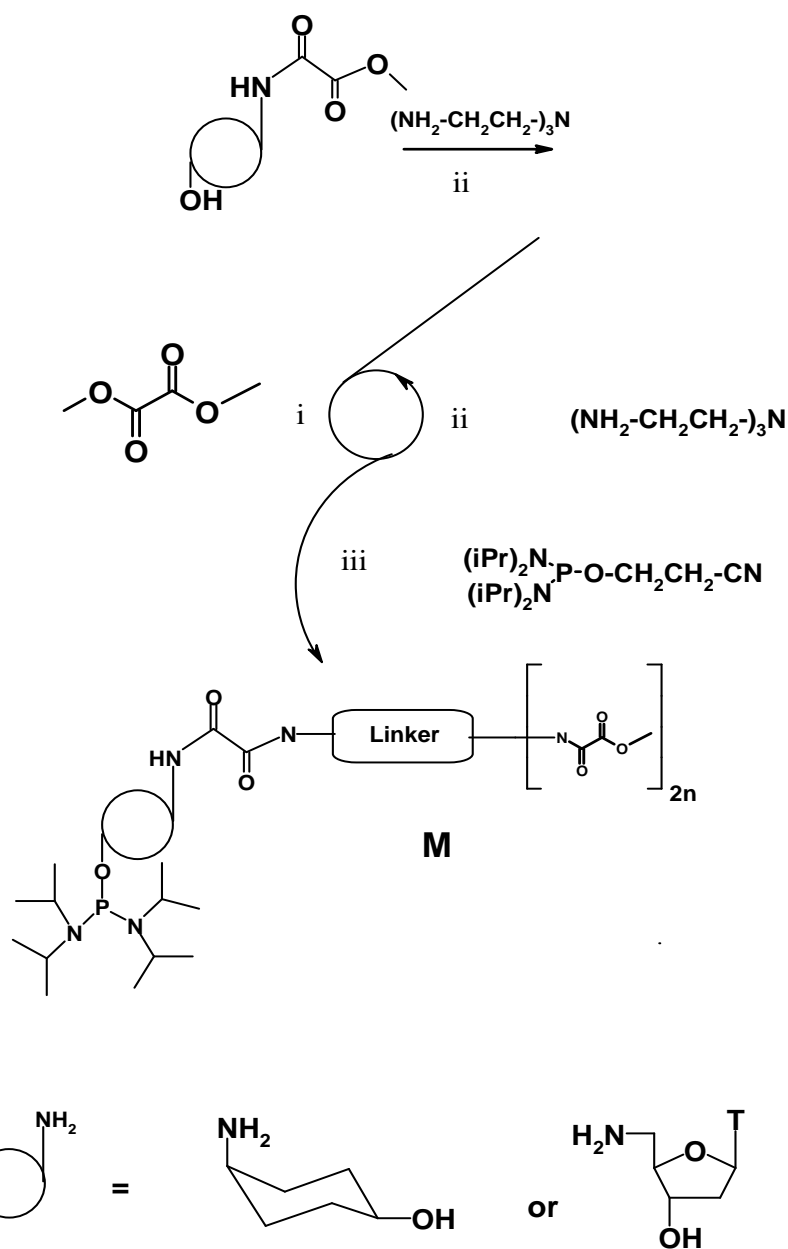

**Figure 1.** Synthesis of terminal modifiers bearing 1-8 methoxyoxaloamido (MOX) precursor groups along with a phosphoramidite moiety: (i) treatment with dimethyl oxalate; (ii) treatment with tris(2-aminoethyl)amine; (iii) phosphitylation.

Supplementary material

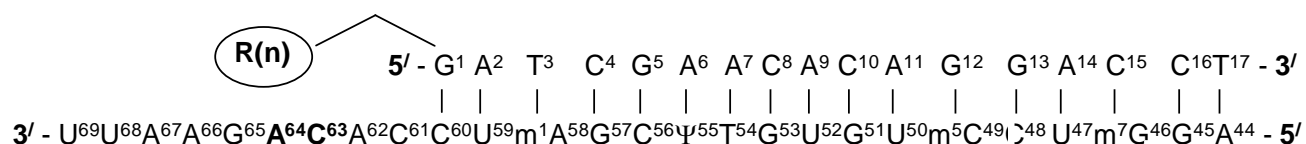

**Figure 2.** A shortened model used for the DNA:RNA hybrid in the molecular modeling calculations, comprising a target RNA sequence (corresponding to the <sup>5'</sup>A<sub>44</sub>-U<sub>69</sub> fragment of T-arm of the tRNA<sup>Phe</sup>) and a 17-mer oligonucleotide conjugate complementary to the <sup>5'</sup>A<sub>44</sub>-U<sub>60</sub> RNA region. **R(n)** is one of cleaving groups shown in Fig. 1, A.
